# Supplementary material for: Exploiting the synergistic effect of multiphase MnO2 stabilized by an integrated conducting network for aqueous zinc-ion batteries
Source: Royal Society of Chemistry journal article supplement (doi:10.1039/d2qm00254j), 2022-01-01
Supplement: d2qm00254j1.pdf [file d2qm00254j1.pdf]

# Exploiting synergistic effect of multiphase MnO<sub>2</sub> stabilized by integrated conducting network for aqueous zinc-ion batteries

Na Fu <sup>a</sup>, Qingyuan Zhao <sup>a</sup>, Yuting Xu <sup>a</sup>, Hongrui Wang <sup>a</sup>, Junping Hu <sup>a</sup>, Yuping Wu<sup>c</sup>,  
Linlin Yang<sup>d\*</sup>, Xiongwei Wu <sup>a,b\*</sup>, and Xianxiang Zeng <sup>a\*</sup>

<sup>a</sup> School of Chemistry and Materials Science, Hunan Agricultural University, Changsha, Hunan 410128, P. R. China

<sup>b</sup> School of Electrical and Information Engineering, Hunan University, Changsha, Hunan 410082, P.R. China

<sup>c</sup> School of Energy and Environment, Southeast University, Nanjing, Jiangsu, 210018, P.R. China

<sup>d</sup> Shanghai Electric Lingchu Energy Storage Technology Co., Ltd, Shanghai, 201800, P.R. China

Corresponding authors.

\*E-mail addresses: yanglinlinzh@163.com (Lin-Lin Yang); wxwcsu05@aliyun.com (Xiong-Wei Wu); xxzeng@hunau.edu.cn (Xian-Xiang Zeng)

## Experimental Section

*Preparation of δ-MnO<sub>2</sub> Electrode:* The δ-MnO<sub>2</sub> was synthesized by simply

heated the  $\text{KMnO}_4$  precursor at  $800^\circ\text{C}$  for 5h in the muffle furnace. The resulting brown powder product was collected by filtration, washed by Distilled Deionized water and left to dry in ambient condition overnight.

*Preparation of  $\alpha\text{-MnO}_2$  Electrode:* The  $\alpha\text{-MnO}_2$  nanorods were synthesized based on procedure in literature with slight modifications.<sup>1</sup> 15mL of 0.2 mol / L  $\text{KMnO}_4$  and 15mL 0.6 mol / L  $\text{MnSO}_4\cdot\text{H}_2\text{O}$  were first mixed and stirred at 400 rpm for 2 h, transferred into a 50 mL Teflon-line stainless steel autoclave, and reacted at  $150^\circ\text{C}$  for 8h. after cooling down to room temperature, the precipitate was collected by filtration, washed by Distilled Deionized water and ethanol for several times. Lastly, the products were dried at  $80^\circ\text{C}$  for 12 h.

*Preparation of CMO Electrode:* The 3D material was synthesized by first mixing  $\alpha\text{-MnO}_2$  and  $\delta\text{-MnO}_2$  with a 1:2 weight ration. Then, The CMO slurry was prepared by mixing 3D material, super P carbon and polyvinylidene fluoride with a 7:2:1 weight ration in N-Methyl-2-pyrrolidene. The slurry was doctor bladed onto a carbon paper and left to dry in an oven at  $80^\circ\text{C}$  overnight. The active material loading of the electrode is  $\sim 2 \text{ mg cm}^{-1}$ .

*Preparation of CMOP Electrode:* The PEDOT layer was then coated on the surface of CMO by electrodeposition in a solution of  $0.008 \text{ mol L}^{-1}$  3,4-ethylenedioxythiophene,  $0.01 \text{ mol L}^{-1}$  lithium perchlorate, and  $0.014 \text{ mol L}^{-1}$  sodium dodecyl sulfate at 1.0 V for 300s at room temperature.

*Electrochemical Measurement:* The PEDOT electrodeposition processes was achieved by a CHI760D workstation and traditional three electrode cell using a Pt

wire as counter electrode, an Ag / AgCl as reference electrode and a 10\*10 mm carbon cloth as working electrode in room temperature. Cyclic voltammetry, galvanostatic charge / discharge measurements, and electrochemical impedance spectroscopy were conducted employing a CHI760D workstation. The electrochemical characterizations of the aqueous battery were performed in a solution of 2 mol L<sup>-1</sup> ZnSO<sub>4</sub> and 0.1 mol L<sup>-1</sup> MnSO<sub>4</sub>.

*Material Characterization:* The microstructures and compositions of the electrode materials were analyzed using field-emission SEM (JEOS-6701F), TEM (HT7700), Raman spectroscopy (LabRAM HR Evolution), XPS (Thermo Kalpha, Thermo ESCALAB 250XI), and XRD ( XRD-6000), FTIR (ALPHR).

*Computational Methods:* Density functional theory calculations were conducted in the Vienna Ab-initio Simulation Package (VASP) with which the projector augmented wave (PAW) formalism was implemented.<sup>2-4</sup> The energy cutoff is 450 eV and the calculations of energy and force were set to 10<sup>-5</sup> eV and 0.05 eV Å<sup>-1</sup> per atom. The k-point mesh of the Brillouin zone was sampled to a 5×5×1 grid for structure optimizations.<sup>5</sup> The adsorption energies (E<sub>a</sub>) formula was  $E_a = E_{Zn} + E_{substrate} - E(Zn-substrate)$ , where E<sub>Zn</sub>, E<sub>substrate</sub>, and E(Zn-substrate) represent the total energy of the Zn, different substrate surfaces, and the energy of the Zn adsorption on the different substrates.

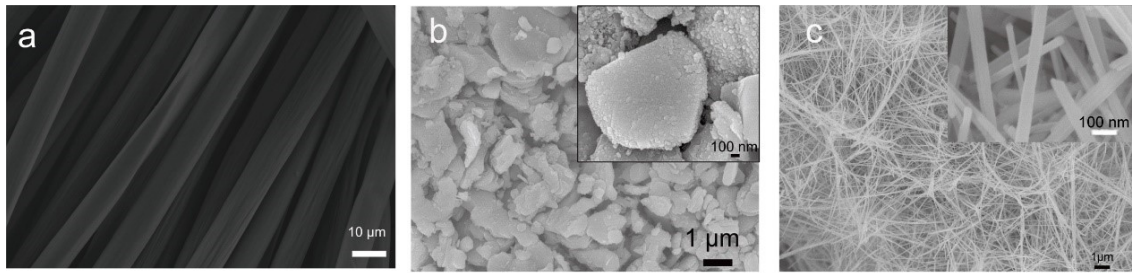

**Fig. S1.** a) SEM image of a carbon cloth substrate. b) Low-and high-(inset) magnification SEM image of  $\alpha$ -MnO<sub>2</sub> and c)  $\delta$ -MnO<sub>2</sub>.

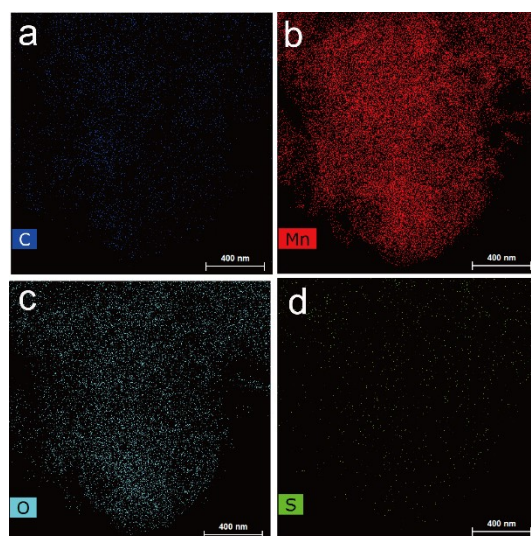

Fig. S2. Mappings for elements of a) C; b) Mn; c) O; d) S for DMOP cathode material.

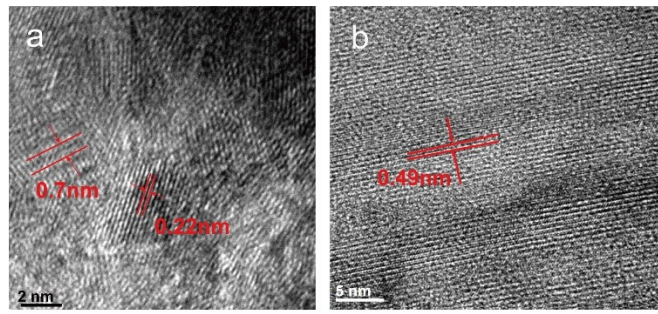

**Fig. S3.** a) TEM image of  $\delta$ -MnO<sub>2</sub> and  $\alpha$ -MnO<sub>2</sub>.

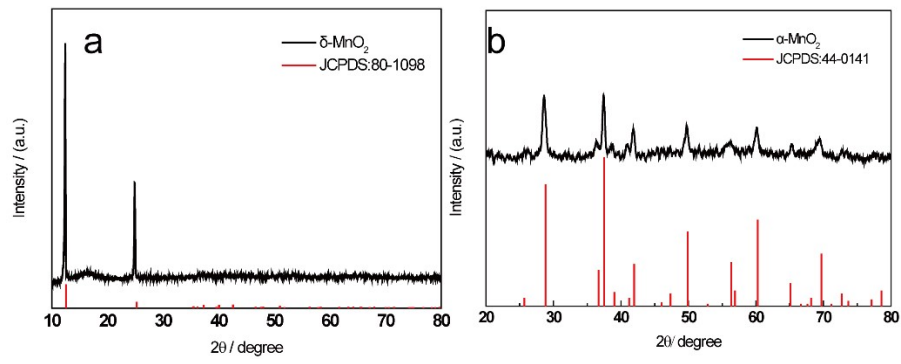

**Fig. S4.** a) XRD image of  $\delta\text{-MnO}_2$  and  $\alpha\text{-MnO}_2$ .

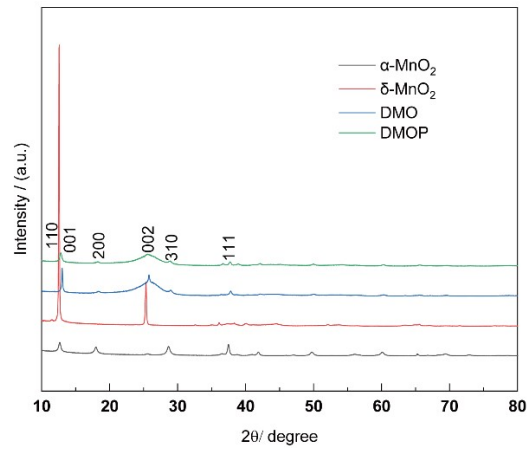

**Fig. S5.** XRD image comparison of different electrode materials.



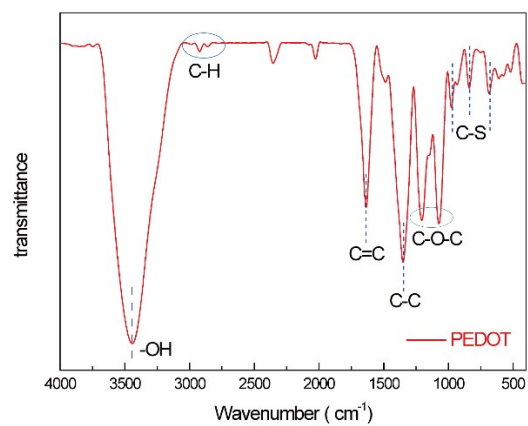

**Fig. S6.** FTIR spectra of pure poly (3,4-ethylenedioxythiophene) (PEDOT).

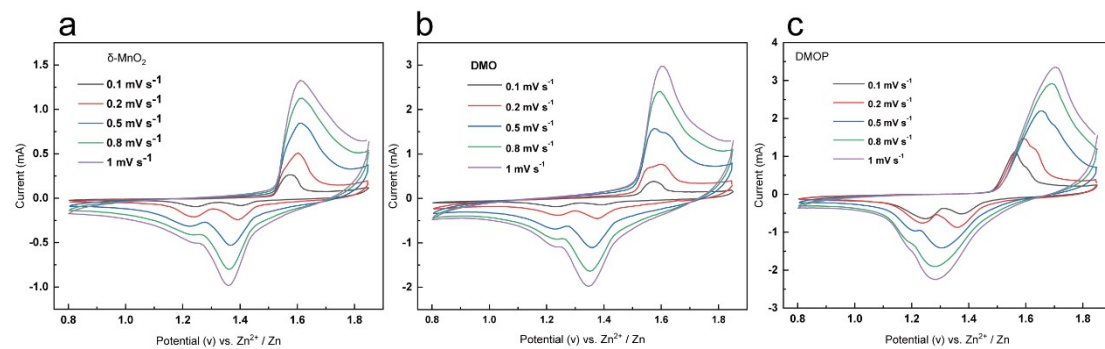

**Fig. S7.** CV curves collected at different scan rates of a)  $\delta$ -MnO<sub>2</sub>, b) DMO and c) DMOP.

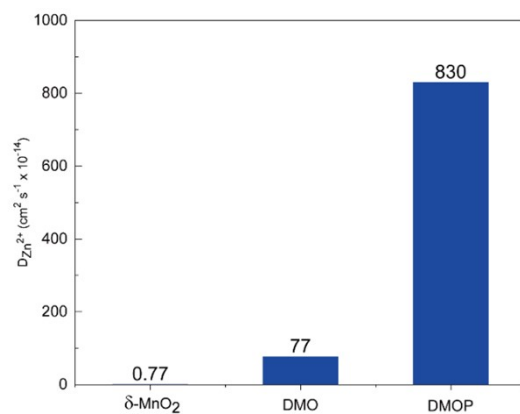

**Fig. S8.** Comparison of the ion diffusion coefficient of  $\delta$ -MnO<sub>2</sub>, DMO and DMOP electrodes.

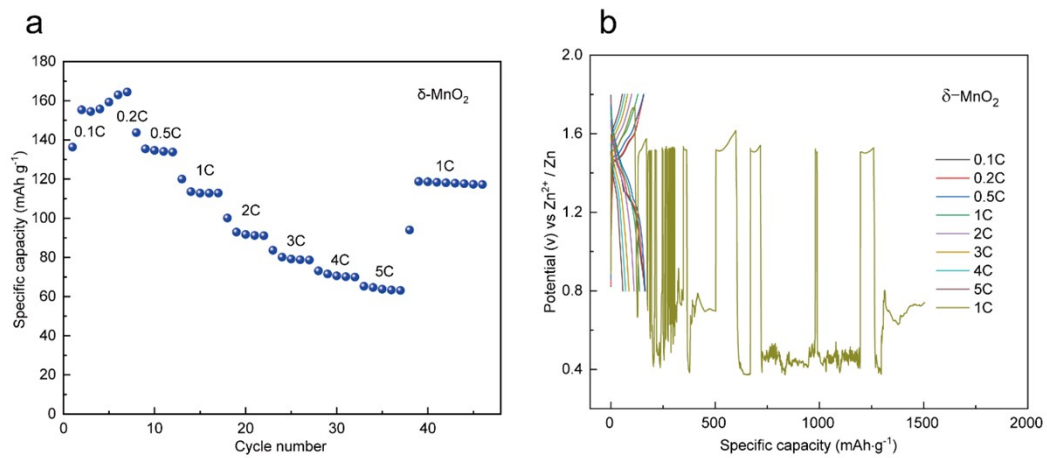

**Fig. S9.** a and b) Charge-discharge curves of  $\delta\text{-MnO}_2$  at the indicated current density.

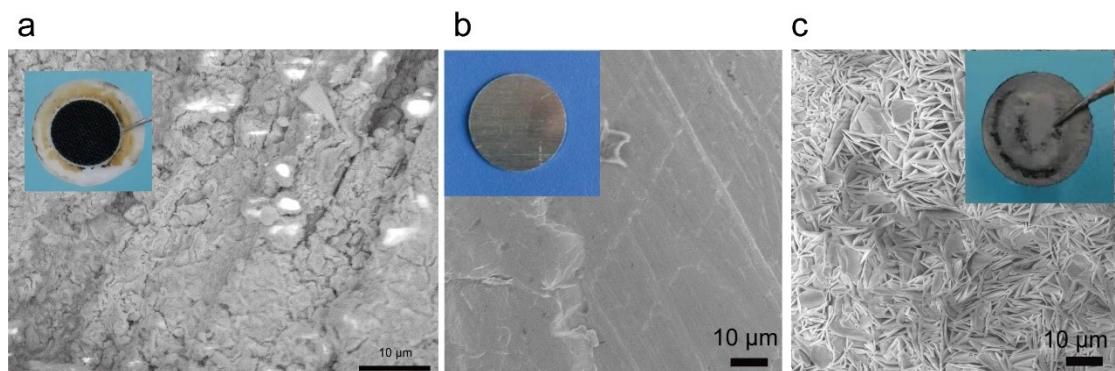

**Fig. S10.** a) SEM image after electrochemical reaction of  $\delta$ -MnO<sub>2</sub> cathode material. b) pure Zn anode, c) Zn anode after electrochemical reaction of  $\delta$ -MnO<sub>2</sub> cathode material.

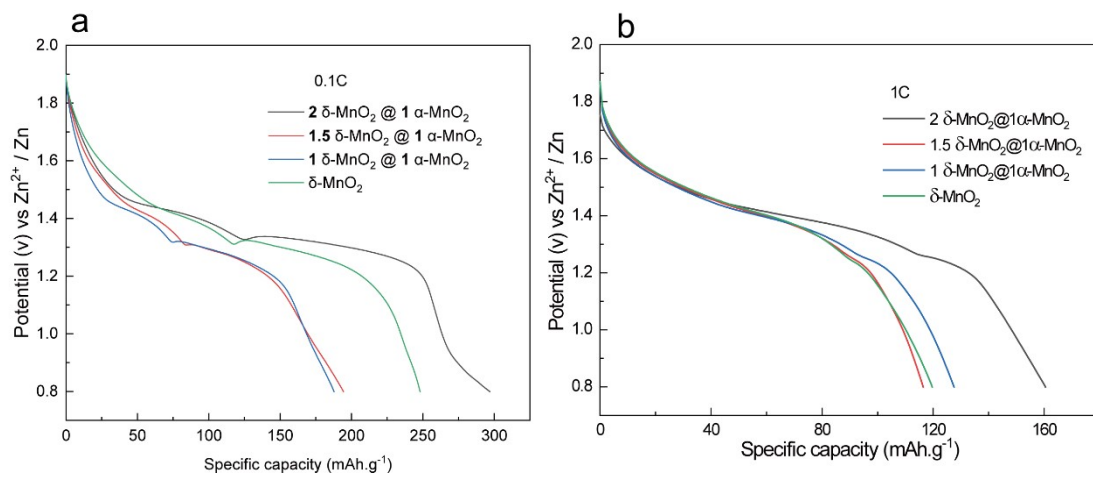

**Fig. S11.** Discharge curves of  $\alpha$ -MnO<sub>2</sub> and  $\delta$ -MnO<sub>2</sub> composites with different mass ratios a) at the first cycle. b) at 1C.

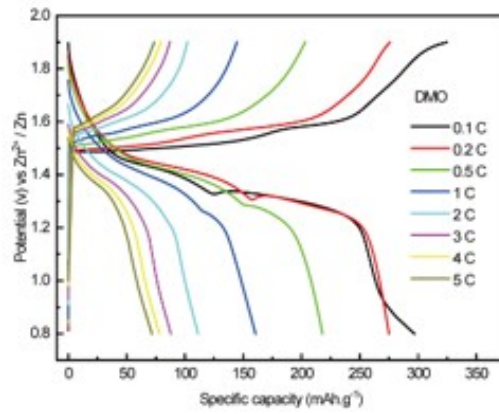

**Fig. S12.** a) Charge-discharge curves of DMO electrode at the indicated current density.

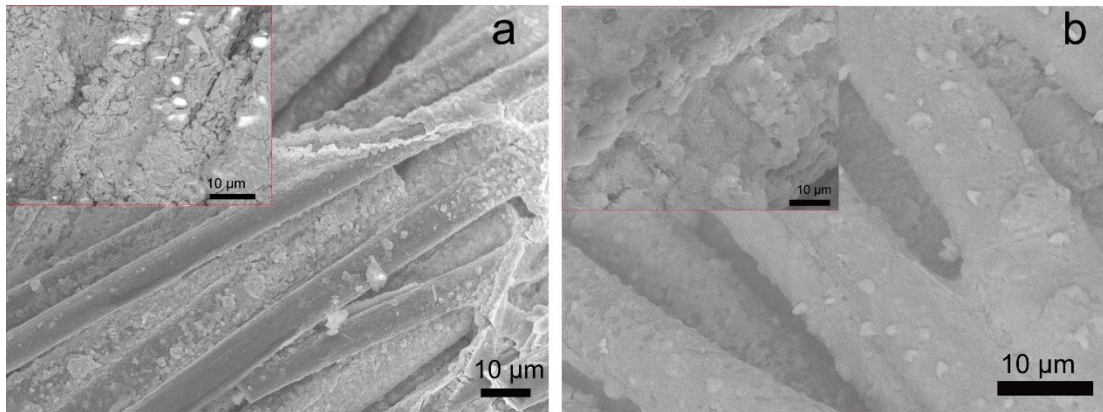

**Fig. S13.** a) SEM image after electrochemical reaction of  $\delta$ -MnO<sub>2</sub> cathode material; b) SEM image after electrochemical reaction of DMO cathode material.



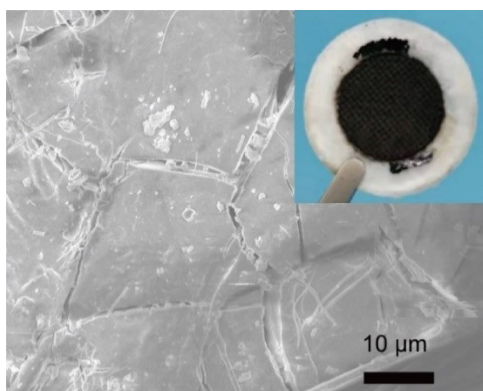

**Fig. S14.** SEM image after electrochemical reaction of DMOP cathode material.

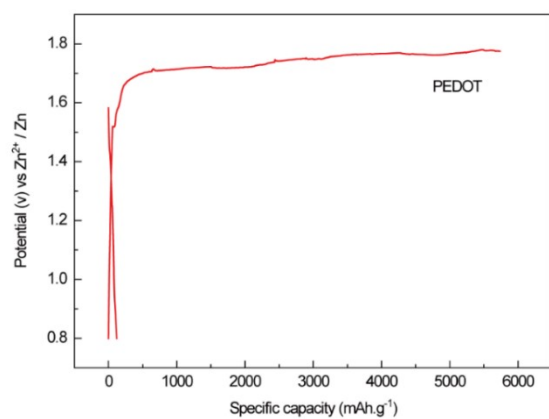

**Fig. S15.** Charge-discharge curves of pure PEDOT electrode at various current density.

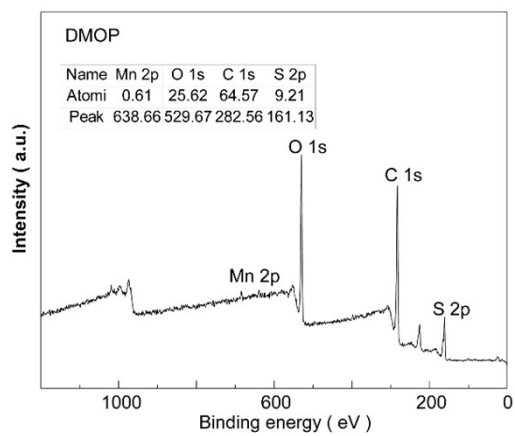

**Fig. S16.** X-ray photoelectron spectroscopy (XPS) of DMOP under stepwise Ar<sup>+</sup> sputtering.

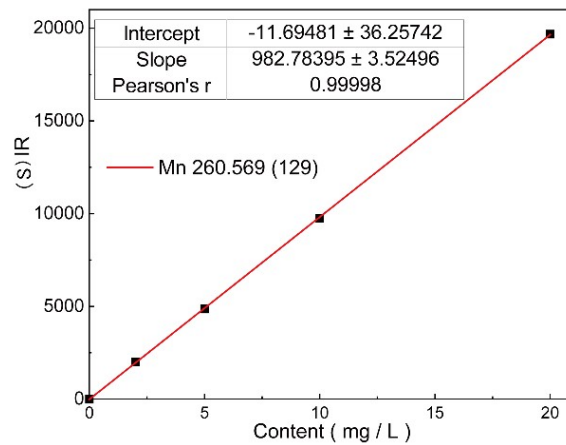

**Fig. S17.** Mn element standard curve of ICP test

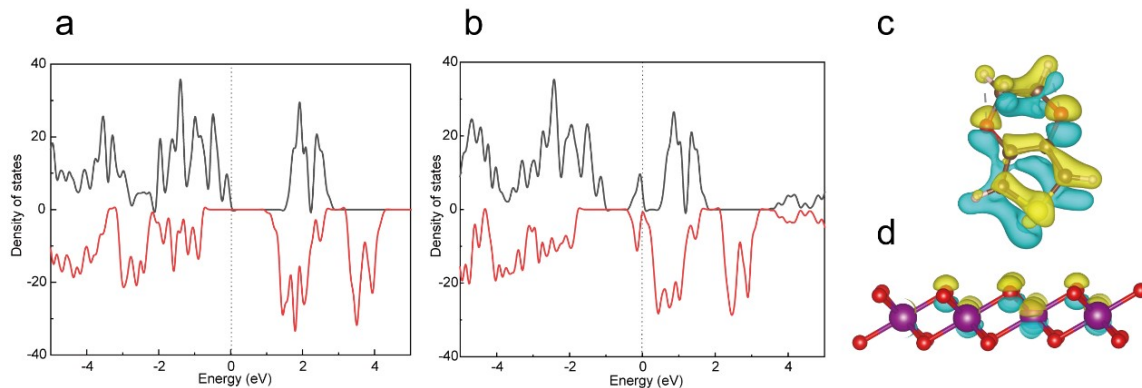

**Fig. S18.** a) Total density of states for  $\text{MnO}_2$  and b)  $\text{MnO}_2$ -PEDOT. The Fermi level is set to be zero. c) Differential charge density in  $\text{MnO}_2$  and d) PEDOT.

## References

- (1) Guo, Y.; Li, L.; Song, L.; Wu, M.; Gao, Y.; Chen, J.; Mao, C.; Song, J.; Niu, H.  $\text{Co}^{2+}$  induced phase transformation from  $\delta$ - to  $\alpha$ - $\text{MnO}_2$  and their hierarchical  $\alpha$ - $\text{MnO}_2$ @ $\delta$ - $\text{MnO}_2$  nanostructures for efficient asymmetric supercapacitors. *J. Mater. Chem. A* **2019**, 7 (20), 12661-12668, DOI: 10.1039/c9ta01918a.
- (2) Hohenberg, P.; Kohn, W. Inhomogeneous Electron Gas. *Phys. Rev.* **1964**, 136 (3B), B864-B871, DOI: 10.1103/PhysRev.136.B864.
- (3) G. Kresse av, J. Furthmiiller. Efficiency of ab-initio total energy calculations for metals and semiconductors using a plane-wave basis set. *Phys. Rev. B* **1996**, 54, 11169, DOI: 10.1016/0927-0256(96)00008-0.
- (4) G. Kresse, J. Furthmu"ller. Efficient iterative schemes for ab initio total-energy

calculations using a plane-wave basis set. *Comput. Mater. Sci.* **1996**, *6*, 15, DOI: 10.1103/physrevb.54.11169.

(5) Zhang, F.; Guo, X.; Xiong, P.; Zhang, J.; Song, J.; Yan, K.; Gao, X.; Liu, H.; Wang, G. Interface Engineering of MXene Composite Separator for High-Performance Li–Se and Na–Se Batteries. *Adv. Energy Mater.* **2020**, *10*(20), DOI: 10.1002/aenm.202000446
